# Supplementary material
Source: PubMed Central journal article supplement (PMC1472441)
Supplement: pnas_0602498103_3.pdf [file pnas_0602498103_3.pdf]

*ade6-M26*

Plasmid: pREP41-DP-hENT-TK pREP1

0 2 3 4 5 6 7 3

WT

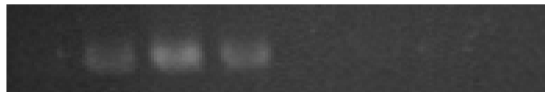*hsk1ts*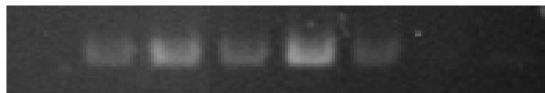WT  
(Total DNA)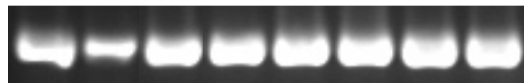*hsk1ts*  
(Total DNA)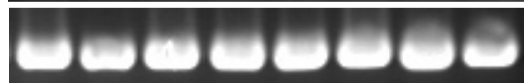

(32°C)

*ars2004*

pREP41-DP-hENT-TK pREP1

0 2 3 4 5 6 7 3 (hr)

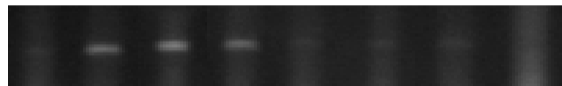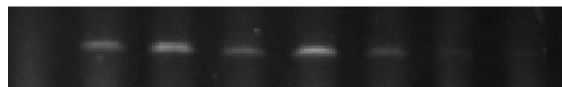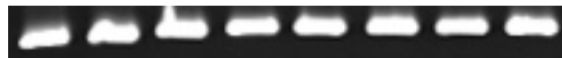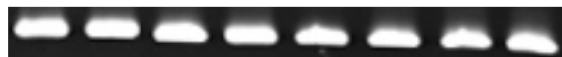

(32°C)
