# Supplementary material
Source: PubMed Central journal article supplement (PMC1472441)

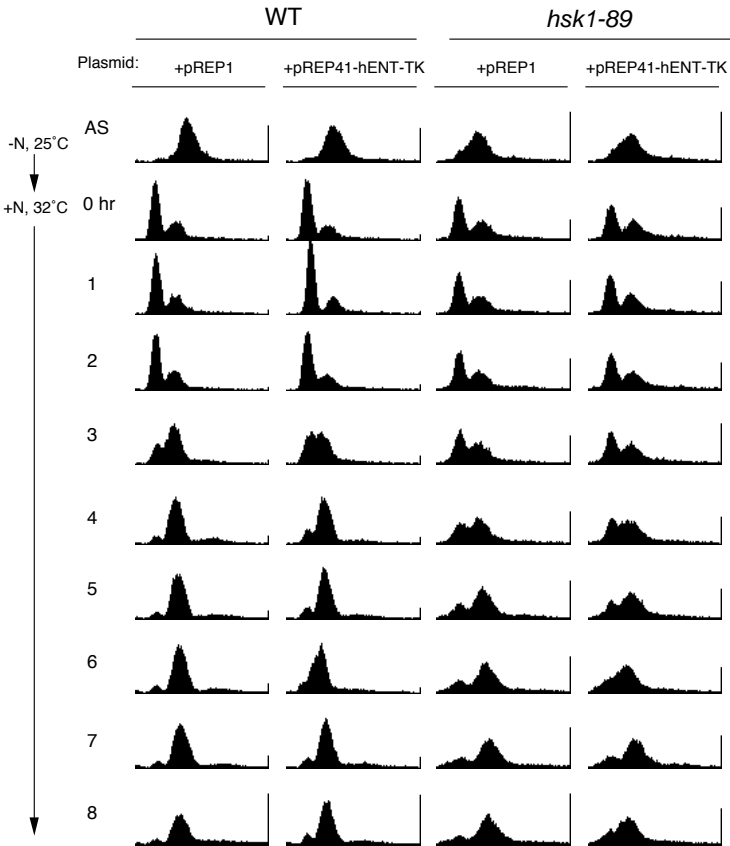

Supplement: pnas_0602498103_1.pdf [file pnas_0602498103_1.pdf]

**A**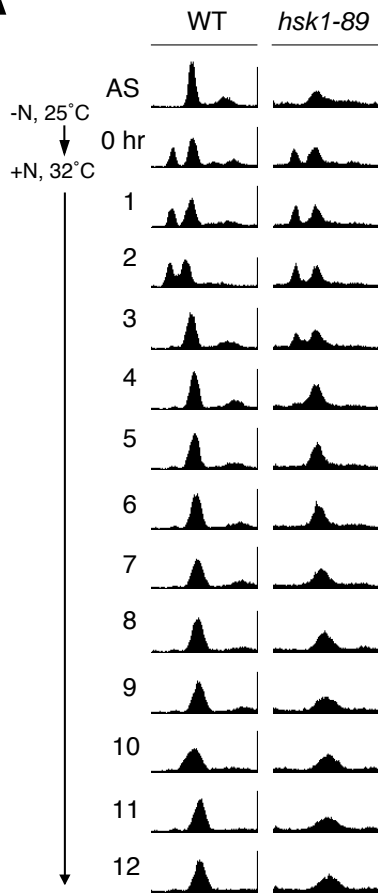**B**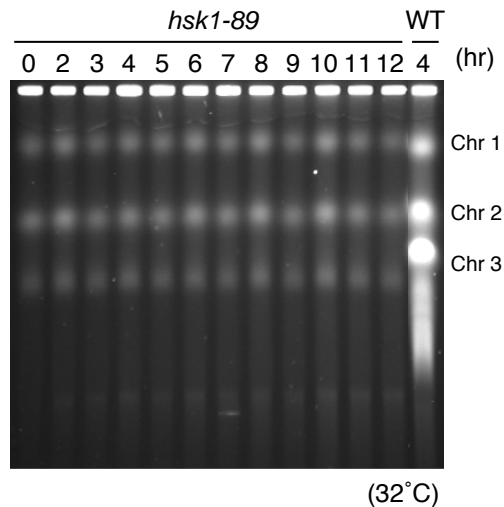

Supplement: pnas_0602498103_2.pdf [file pnas_0602498103_2.pdf]

**A**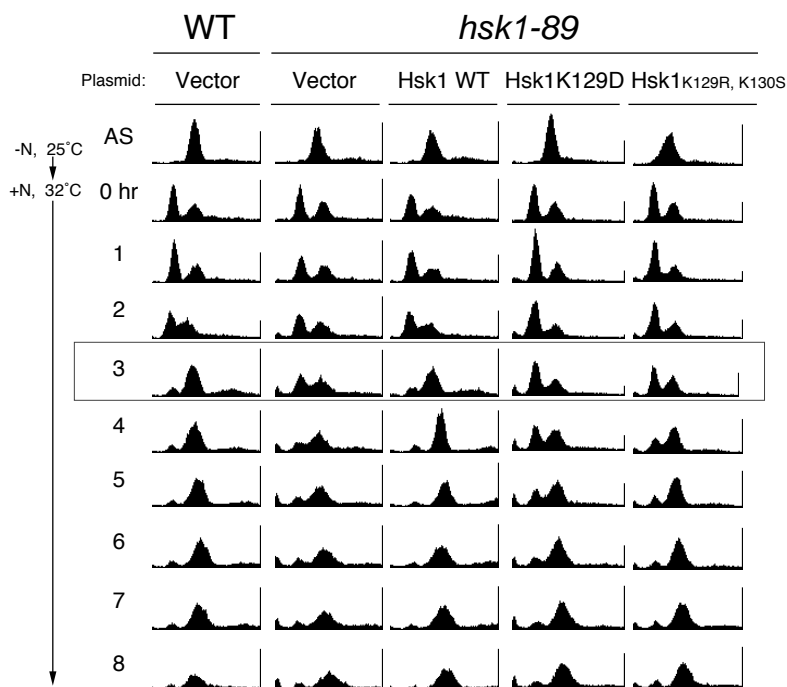**B**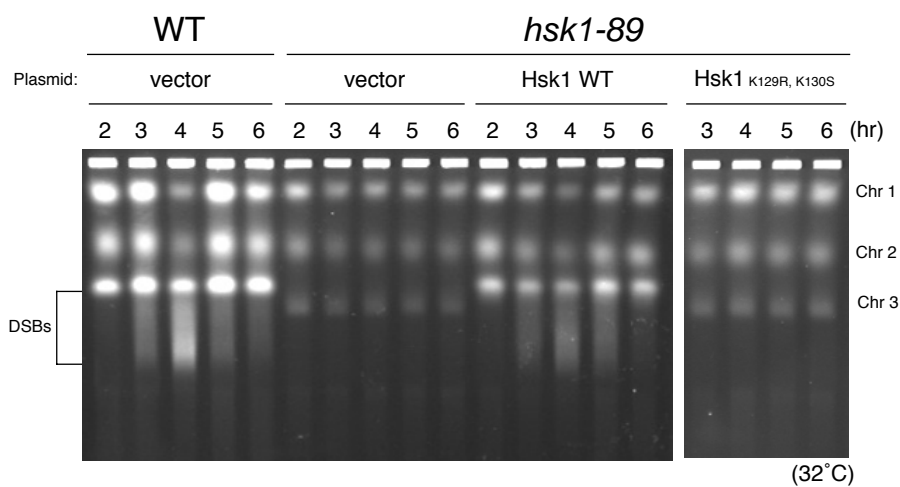**C**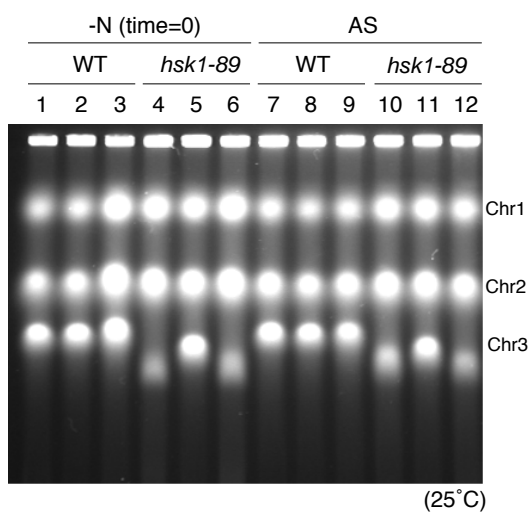

Supplement: pnas_0602498103_4.pdf [file pnas_0602498103_4.pdf]

**A**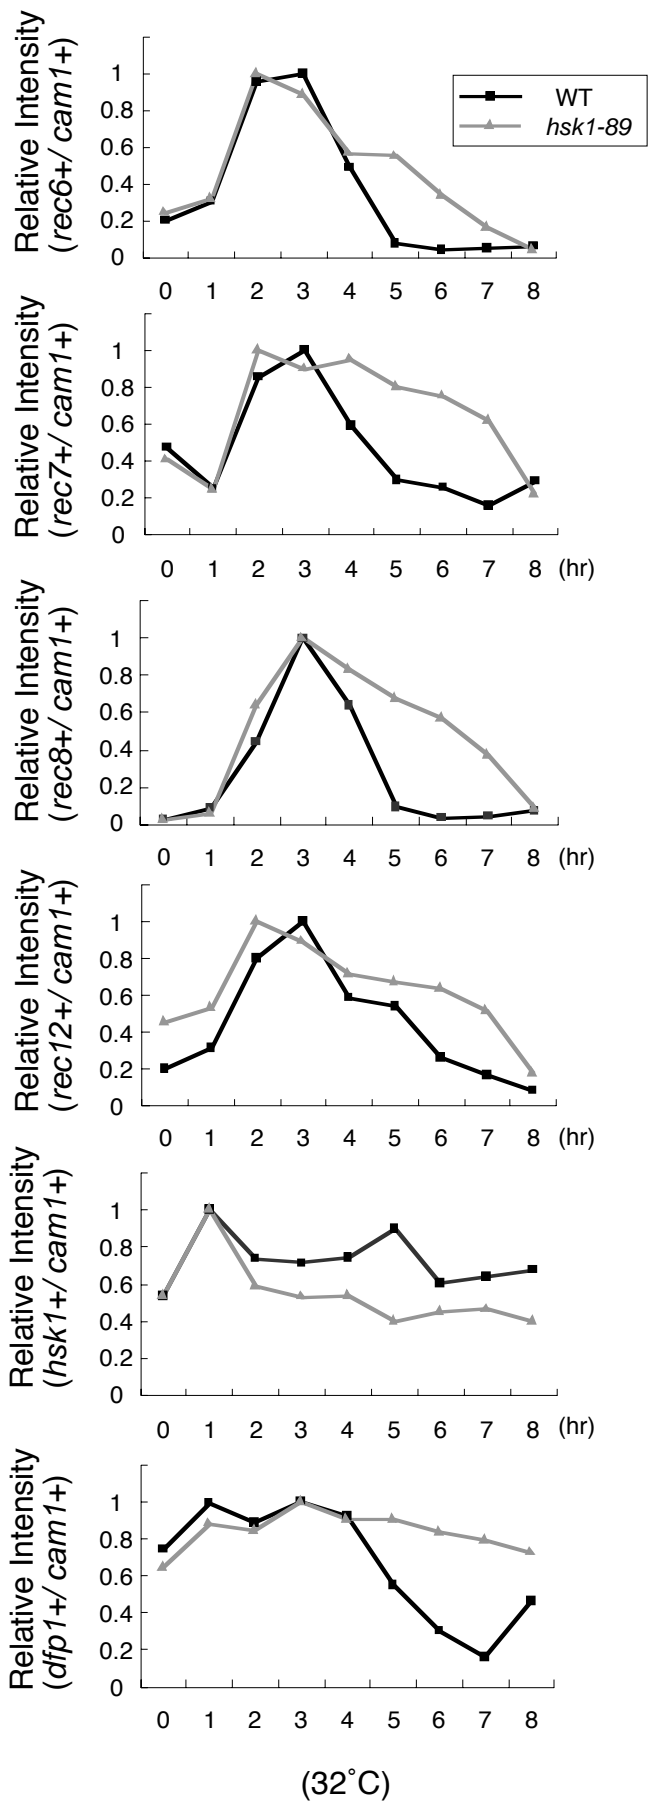**B**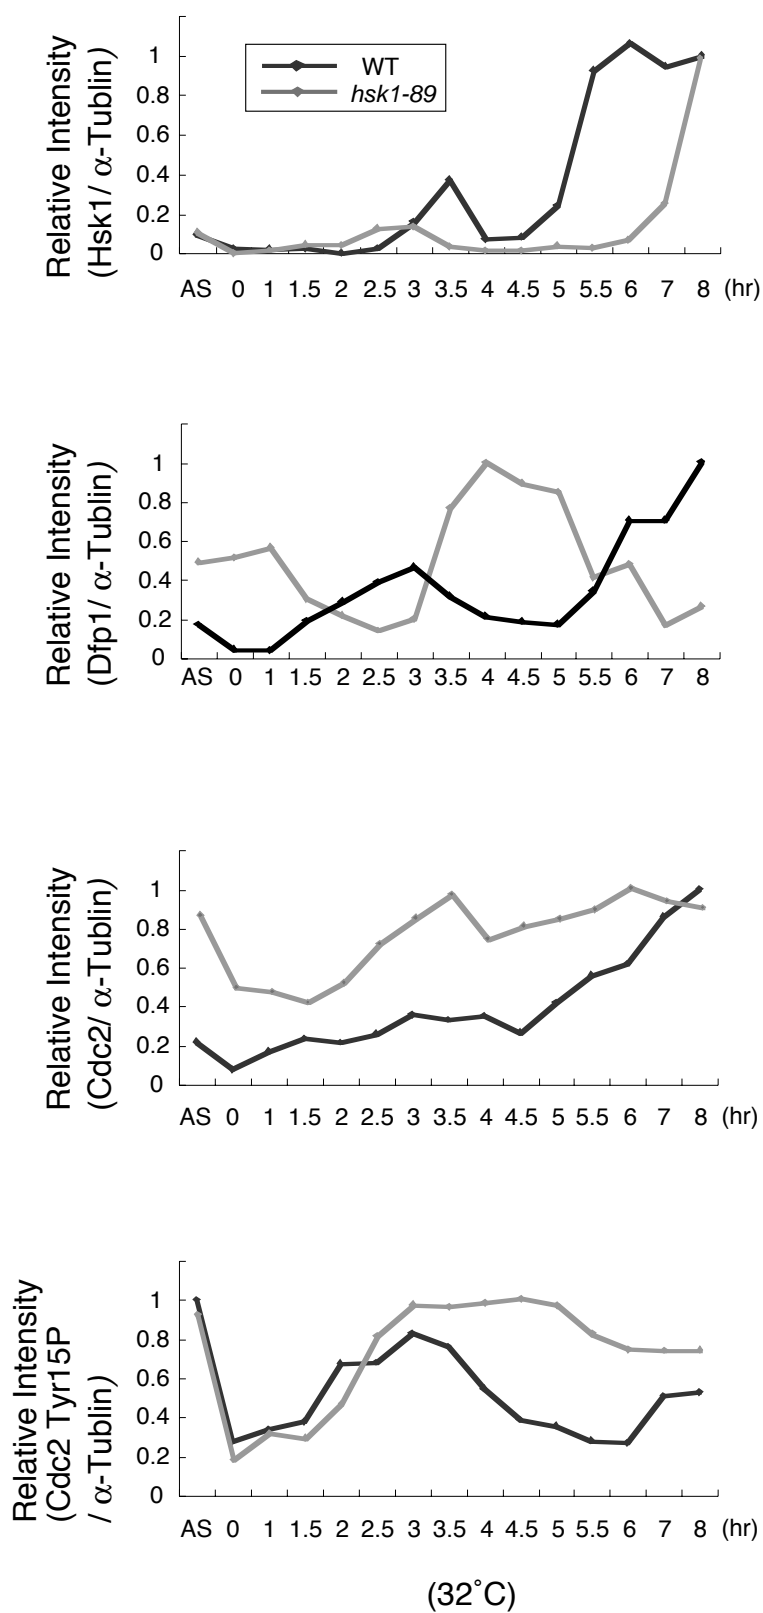

Supplement: pnas_0602498103_5.pdf [file pnas_0602498103_5.pdf]

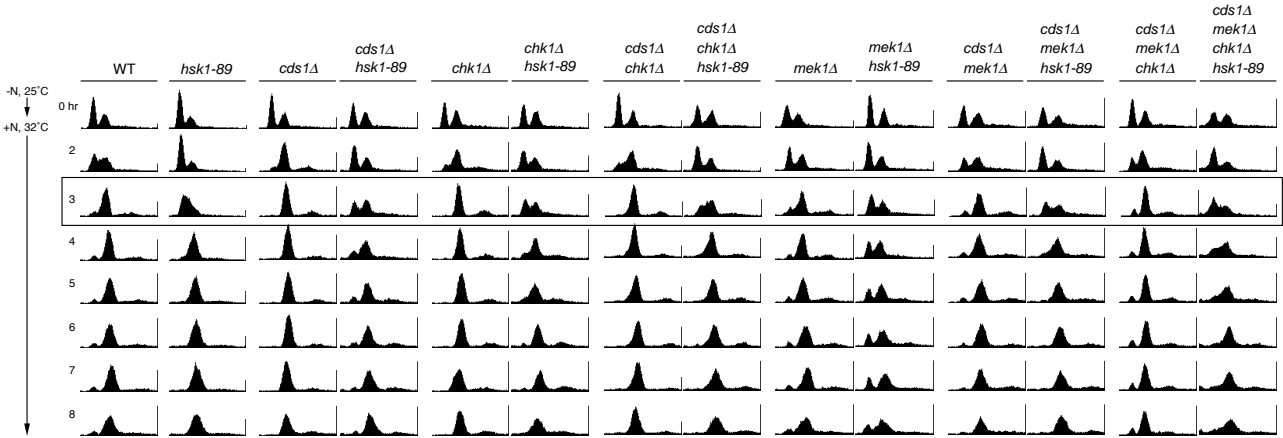

Supplement: pnas_0602498103_6.pdf [file pnas_0602498103_6.pdf]

## Cdc2 Tyr15P

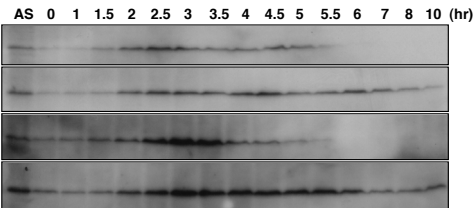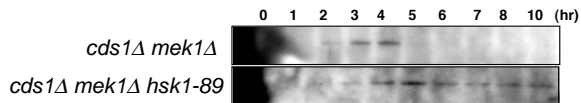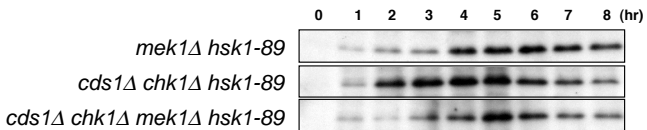

(32°C)

 $\alpha$ -Tubulin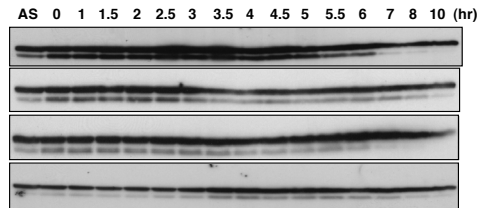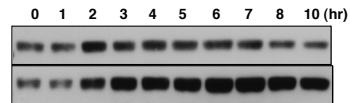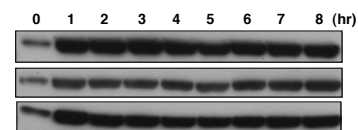

(32°C)

Supplement: pnas_0602498103_7.pdf [file pnas_0602498103_7.pdf]

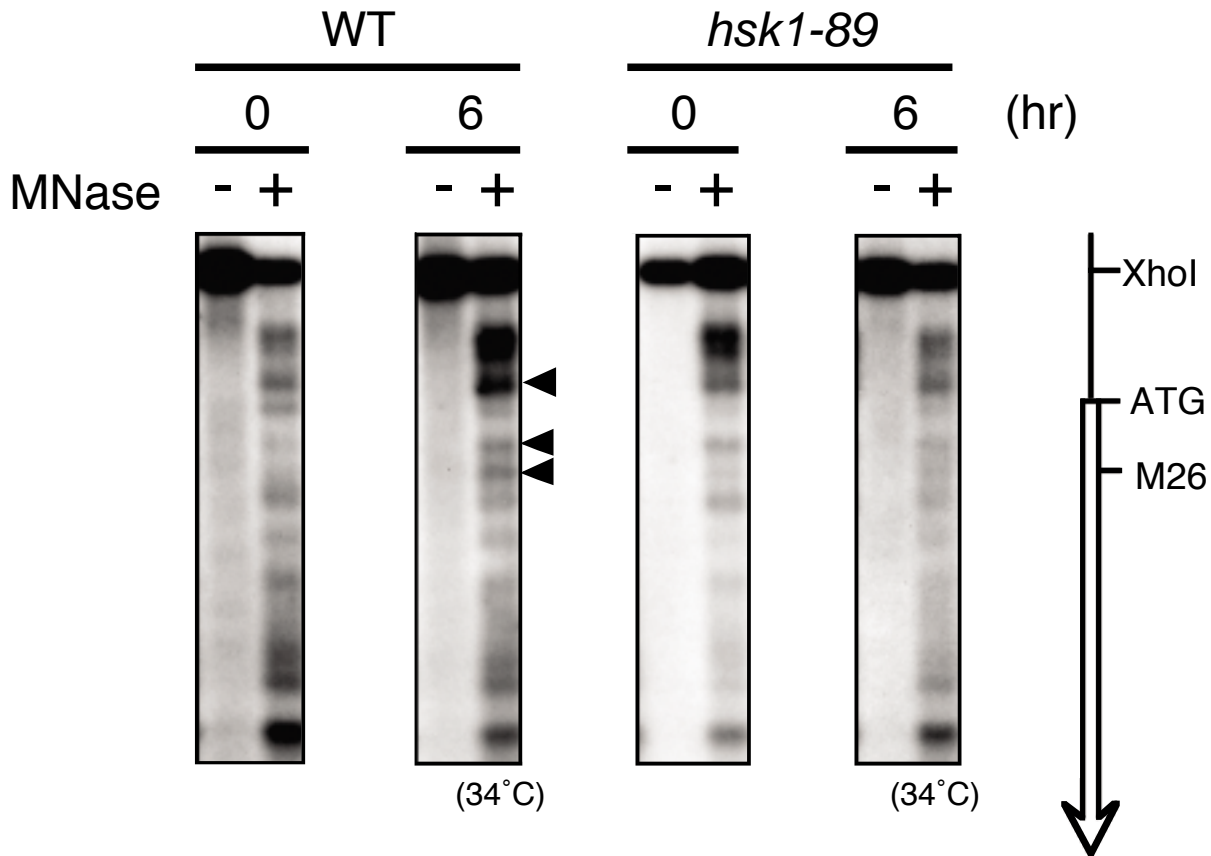

Supplement: pnas_0602498103_8.pdf [file pnas_0602498103_8.pdf]
